# Supplementary material for: Sol–gel preparation of crystalline Ni12P5/N-doped carbon and amorphous Ni–P–C catalysts and their high catalytic performances toward hydrogenation reduction reaction of 4-nitrophenol
Source: Royal Society of Chemistry journal article supplement (doi:10.1039/d1nj01616d), 2021-01-01
Supplement: d1nj01616d1.pdf [file d1nj01616d1.pdf]

# **Sol-gel preparation of crystalline Ni<sub>12</sub>P<sub>5</sub>/N-doped carbon and amorphous Ni-P-C catalysts and their high catalytic performances toward hydrogenation reduction reaction of 4-nitrophenol**

Pingyun Li,<sup>a\*</sup> Haitao Ni,<sup>b</sup> Shengxiang Jiang,<sup>a</sup> Han Wang<sup>a</sup>

<sup>a</sup>National Special Superfine Powder Engineering Research Centre, School of Chemical Engineering, Nanjing University of Science and Technology, Nanjing 210094, Jiangsu, China. E-mail: lipingyun@njust.edu.cn

<sup>b</sup>Chongqing Key Laboratory of Environmental Materials & Remediation Technologies, Chongqing University of Arts and Sciences, Chongqing 402160, China

---

\*Corresponding author. E-mail address: lipingyun@njust.edu.cn (Pingyun Li), Tel.:+86 25 84315050

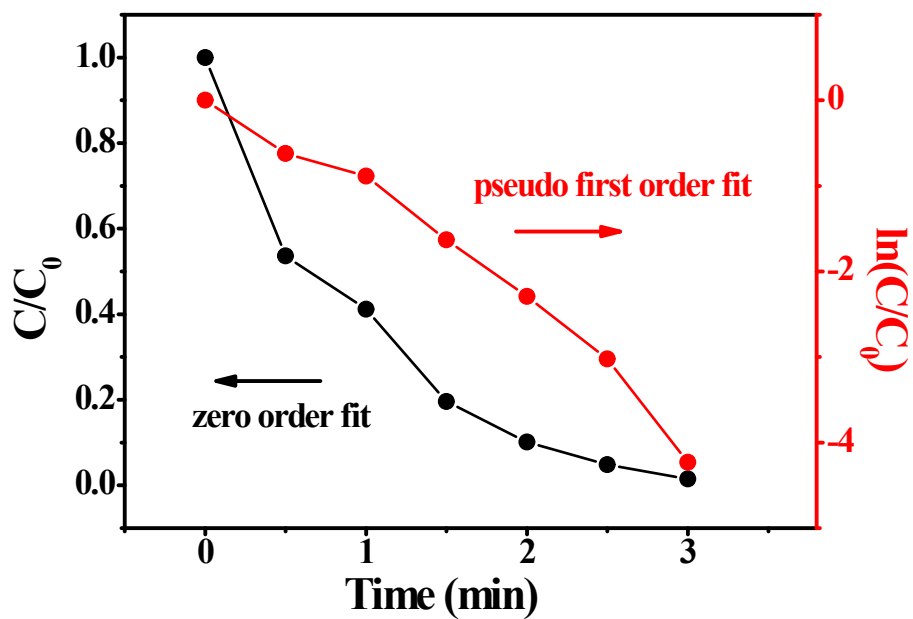

**Figure S1.** Comparison of zero order fit and pseudo order fit of the hydrogenation reaction of 4-NP over the  $\text{Ni}_{12}\text{P}_5/\text{N}$ -doped carbon catalyst being calcinated at 800 °C. The molar ratio of  $\text{NaBH}_4$ :4-NP is 1000:1 and the mass of the catalyst is 0.05 mg.

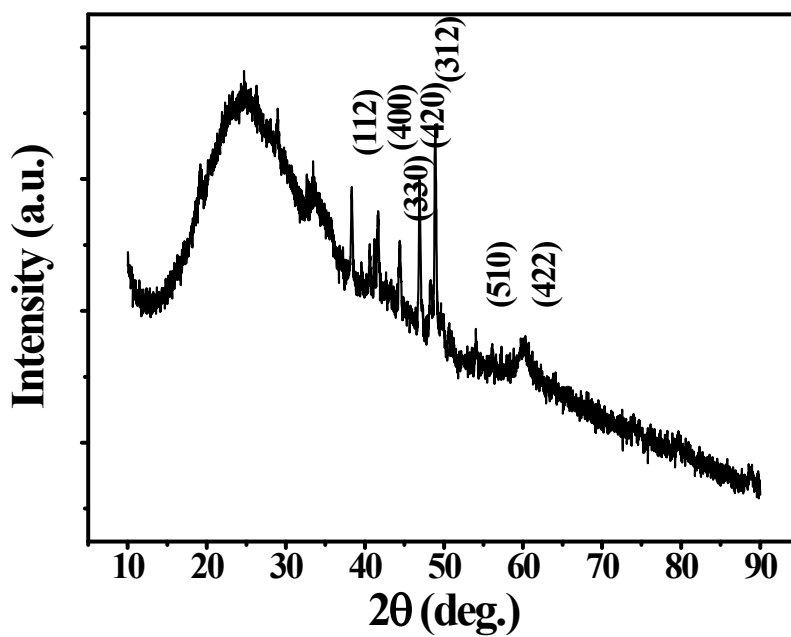

**Figure S2.** XRD profile of the recycled  $\text{Ni}_{12}\text{P}_5/\text{N}$ -doped carbon catalyst where the

original catalyst is prepared at 800 °C

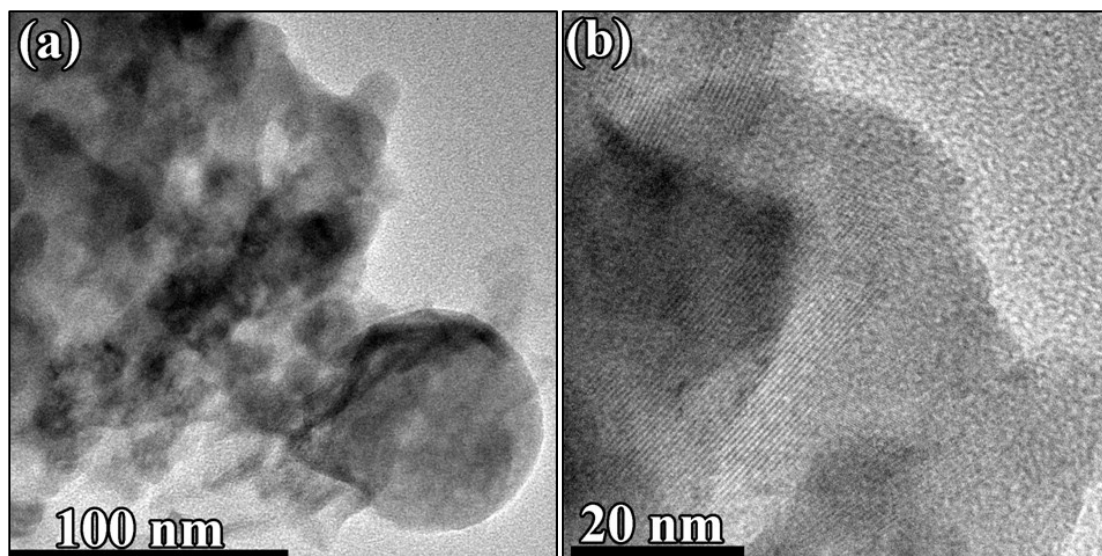

**Figure S3.** TEM image of the recycled  $\text{Ni}_{12}\text{P}_5/\text{N}$ -doped carbon catalyst where the original catalyst is prepared at 800 °C.

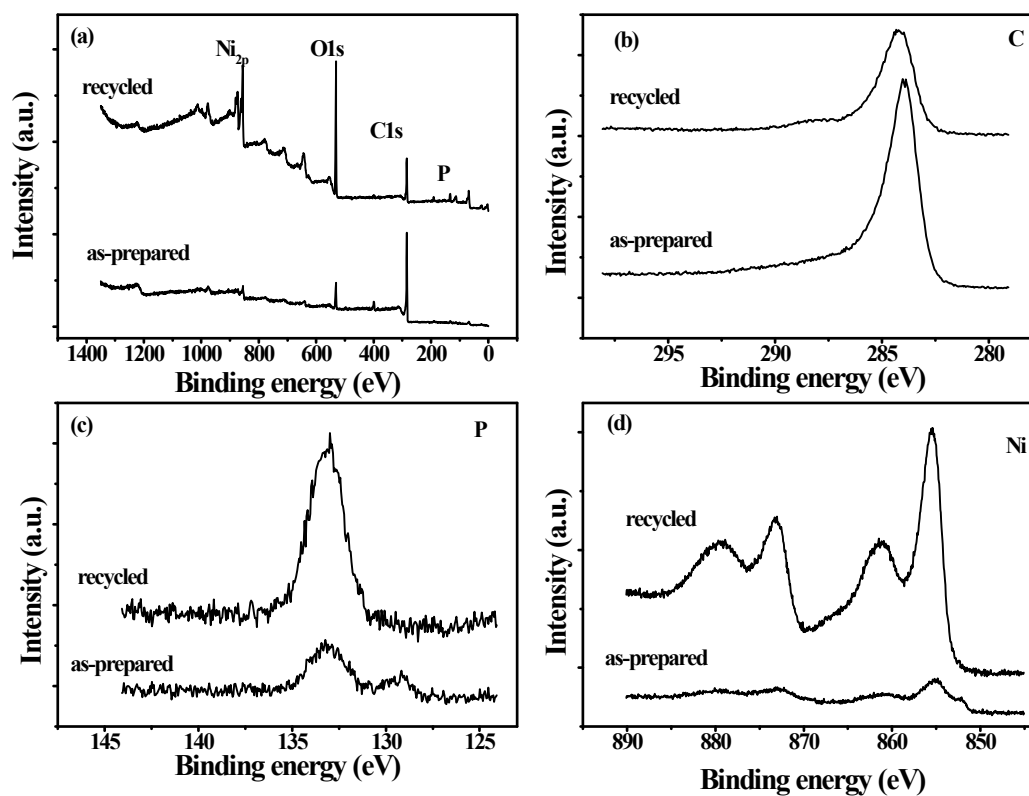

**Figure S4.** XPS analysis results the recycled  $\text{Ni}_{12}\text{P}_5/\text{N}$ -doped carbon catalyst and the original catalyst being prepared at 800 °C.

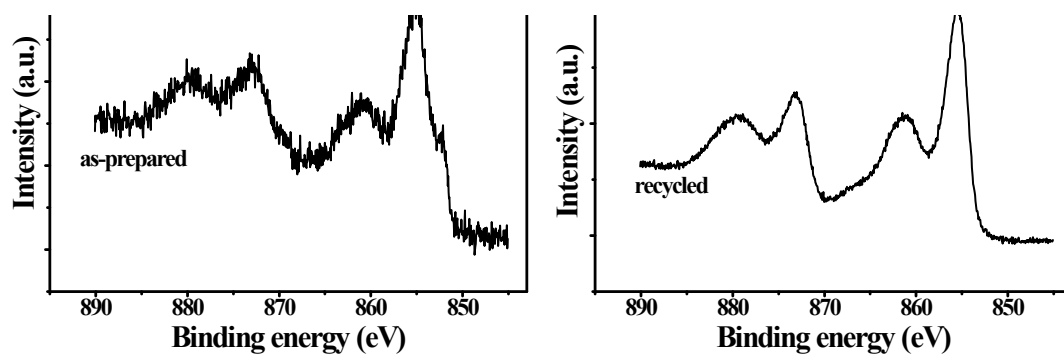

**Figure S5.** XPS profiles of Ni of the recycled  $\text{Ni}_{12}\text{P}_5/\text{N}$ -doped carbon catalyst and the original catalyst being prepared at 800 °C.

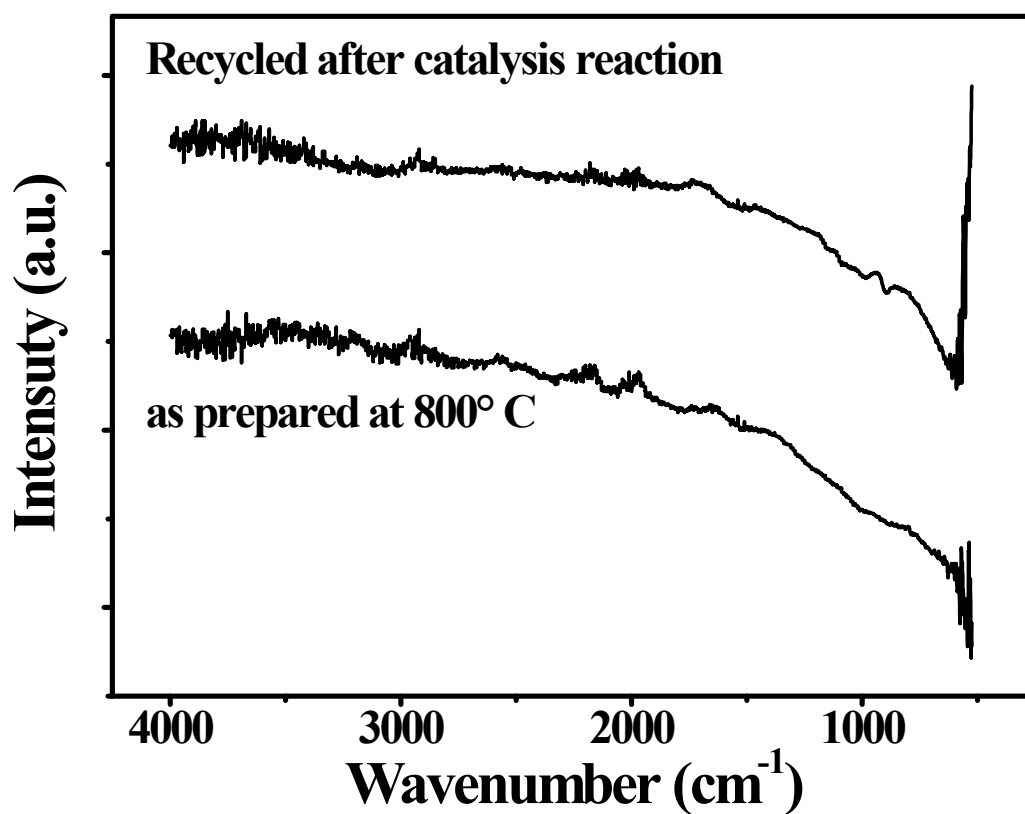

**Figure S6.** FTIR plots of the recycled  $\text{Ni}_{12}\text{P}_5/\text{N}$ -doped carbon catalyst and the original catalyst being prepared at 800 °C.

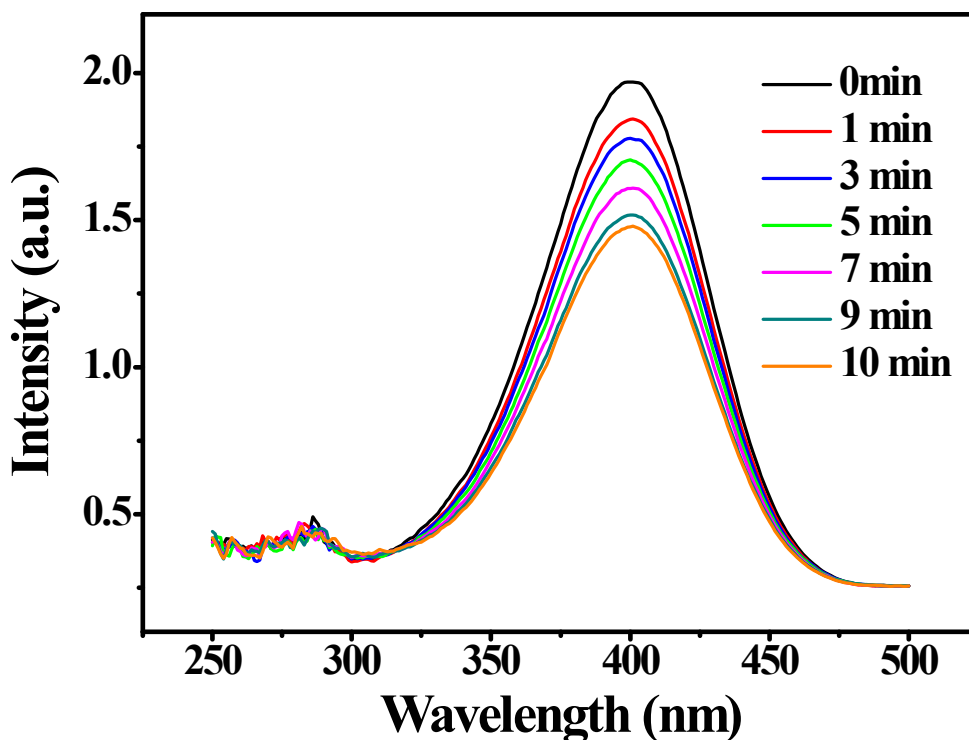

**Figure S7.** UV-vis spectra for the hydrogenation reduction of 4-NP over the catalysts being calcinated at and 800 °C by using EDTA, (NH<sub>4</sub>)<sub>2</sub>HPO<sub>4</sub>, urea, PVP, and de-ionized water. The molar ratio of NaBH<sub>4</sub>:4-NP=1000:1, mass of the catalysts is 0.2 mg.

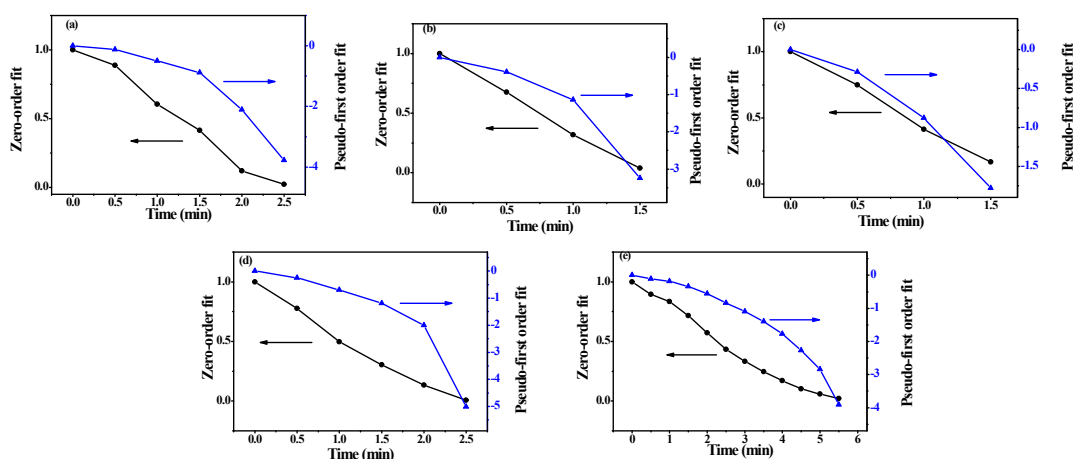

**Figure S8.** Comparison between pseudo zero-order linear fit and pseudo first-order linear fit of the hydrogenation of 4-NP over the amorphous Ni-P-C catalysts being

calcined at 350 (a), 450 (b), 550 (c), 600 (d) and 700 °C (e), respectively.

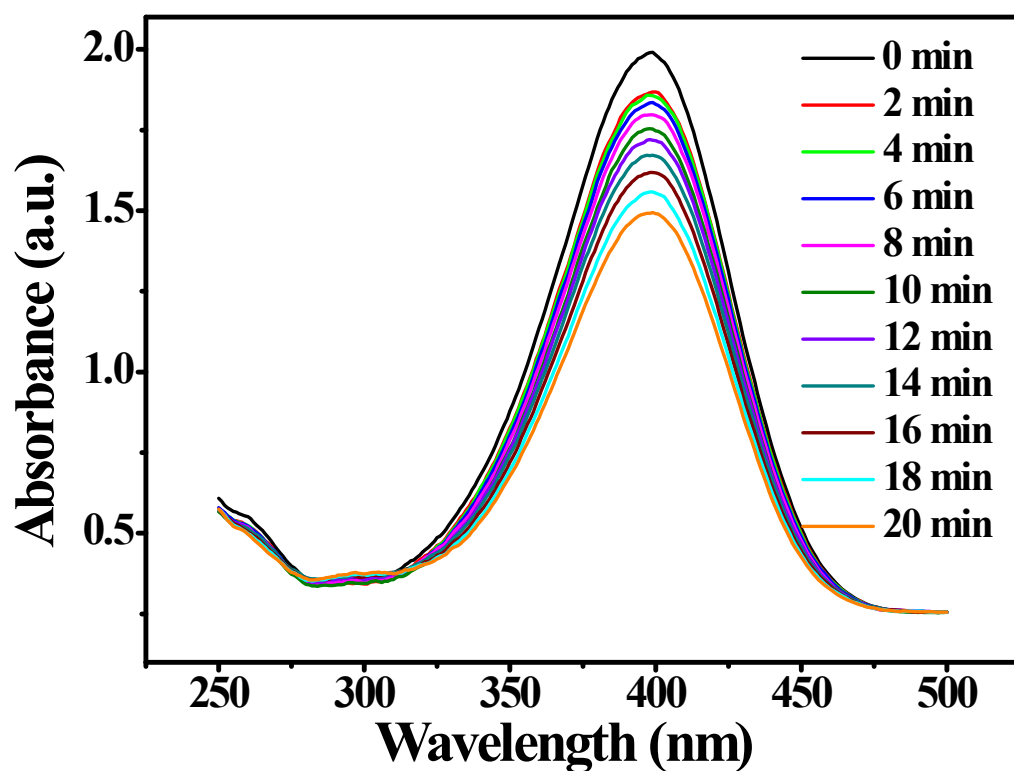

**Figure S9.** UV-vis spectra for the hydrogenation reduction of 4-NP over the product being calcinated at 600 °C by using EG, phosphoric acid, PVP and de-ionized water in the absence of  $\text{Ni}(\text{NO}_3)_2 \cdot 6\text{H}_2\text{O}$ . The mass of the catalysts is 0.2 mg during the catalytic measurements, and the molar ratio of  $\text{NaBH}_4$ :4-NP is 1590:1.
